RESEARCH ARTICLE

# Sociometric network analysis in illicit drugs research: A scoping review

Naomi Zakimi<sup>1\*</sup>, Alissa Greer<sup>1</sup>, Martin Bouchard<sup>1</sup>, Arshpreet Dhillon<sup>1</sup>, Alison Ritter<sup>2</sup>

**1** School of Criminology, Simon Fraser University, Burnaby, British Columbia, Canada, **2** Drug Policy Modelling Program, Social Policy Research Centre, University of New South Wales, Sydney, New South Wales, Australia

\* [naomi\\_zakimi@sfu.ca](mailto:naomi_zakimi@sfu.ca)

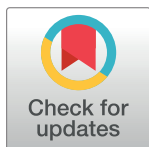

## Abstract

### Background

Sociometric or whole network analysis, a method used to analyze relational patterns among social actors, emphasizes the role of social structure in shaping behaviour. Such method has been applied to many aspects of illicit drug research, including in the areas of public health, epidemiology, and criminology. Previous reviews about social networks and drugs have lacked a focus on the use of sociometric network analysis for illicit drugs research across disciplines. The current scoping review aimed to provide an overview of the sociometric network analysis methods used in illicit drugs research and to assess how such methods could be used for future research.

### Methods

A systematic search of six databases (Web of Science, ProQuest Sociology Collection, Political Science Complete, PubMed, Criminal Justice Abstracts, and PsycINFO) returned 72 relevant studies that met the inclusion criteria. To be included, studies had to mention illicit drugs and use whole social network analysis as one of their methods. Studies were summarized quantitatively and qualitatively using a data-charting form and a description of the studies' main topics.

### Results

Sociometric network analysis in illicit drugs research has grown in popularity in the last decade, using mostly descriptive network metrics, such as degree centrality (72.2%) and density (44.4%). Studies were found to belong to three study domains. The first, drug crimes investigated network resilience and collaboration patterns in drug trafficking networks. The second domain, public health, focused on the social networks and social support of people who use drugs. Finally, the third domain focused on the collaboration networks of policy, law enforcement, and service providers.

## OPEN ACCESS

**Citation:** Zakimi N, Greer A, Bouchard M, Dhillon A, Ritter A (2023) Sociometric network analysis in illicit drugs research: A scoping review. PLoS ONE 18(2): e0282340. <https://doi.org/10.1371/journal.pone.0282340>

**Editor:** Carl A. Latkin, Johns Hopkins University Bloomberg School of Public Health, UNITED STATES

**Received:** June 29, 2022

**Accepted:** February 12, 2023

**Published:** February 27, 2023

**Copyright:** © 2023 Zakimi et al. This is an open access article distributed under the terms of the [Creative Commons Attribution License](https://creativecommons.org/licenses/by/4.0/), which permits unrestricted use, distribution, and reproduction in any medium, provided the original author and source are credited.

**Data Availability Statement:** All relevant data are within the paper and its [Supporting information](#) files.

**Funding:** This work was supported by The Social Sciences and Humanities Research Council (SSHRC) under Grant #435-2021-0749 (AG). The funders had no role in study design, data collection and analysis, decision to publish, or preparation of the manuscript.

**Competing interests:** The authors have declared that no competing interests exist.

## Conclusion

Future illicit drugs research using whole network SNA should include more diverse data sources and samples, incorporate mixed and qualitative methods, and apply social network analysis to study drug policy.

## Introduction

Social network analysis (SNA) is both a theoretical perspective and a methodological approach to examining the social connections and structures among social beings. Its foundations can be traced back to early 1900s business, anthropology, and sociology research [1–3]. Business and organizational research conducted at Harvard's School of Business Administration played an important role in developing and popularizing early SNA methods [2, 4, 5]. Jacob Moreno and Helen Jennings, working within the psychiatric and psychological fields, are most often credited with the birth of SNA as we know it today [6–8]. Since then, SNA has been used in a wide variety of disciplines in the social sciences, such as anthropology, criminology, and education, and has turned into a “vibrant multidisciplinary field” [9]. SNA is a particularly useful approach because it treats people as interconnected social beings, emphasizing the role of structure in shaping behaviour. As a method, SNA provides a variety of tools stemming from graph theory to study all kinds of interactions, from human and animal relationships to institutional and government processes [2, 9].

Broadly speaking, social network studies can focus on a network as a whole (e.g., the network of all friendships in a classroom) or on egocentric networks (e.g., the individual network of each student) [10]. Most commonly, SNA studies will administer questionnaires and/or interviews to participants to elicit names of contacts that represent specific relationships or ties (i.e., social support, friendship) [11]. Another important type of network data comes from archival sources, which contain data that were not collected with the purpose of conducting SNA, such as police files or historical documents. This data collection strategy is useful when studying hard-to-reach populations, such as criminal organizations, politicians, or historical figures [12–14]. Although rare, observations can be a rich data source for researchers who are able to conduct fieldwork [15]. This data collection method can help uncover relationships participants may not have shared in a questionnaire or interview [16, 17]. Collectively, this variety of sources—observational, archival, and questionnaires or interviews—facilitates the multidisciplinary use of SNA.

Once data are collected, different analytical tools are available to study social networks. SNA techniques can be divided into three categories: descriptive network graphs, whole network or individual quantitative measures/metrics, and advanced network modelling [18]. First, descriptive network graphs can be used to visualize social ties. Network graphs can help illustrate and describe network data, as well as uncover relationship patterns that may be difficult to grasp using other methods. Second, network measures can be calculated for both the network as a whole or for individuals within the network. Whole network (or sociometric) measures—the interest for the current review—can provide information about density (i.e., the portion of total possible connections that actually exist in the network) and centralization (i.e., how focused a network is on a single node or person) [19, 20]. Individual-level measures can detect the most central member in a network in terms of how many connections they have (i.e., degree centrality) or how often they act as “brokers” connecting otherwise unconnected nodes (i.e., betweenness centrality) [19]. The last category of analysis includes more advanced network modelling techniques that can account for the autocorrelation that is present in

network data, such as exponential random graph models (ERGM) [21]. Aside from these visual and quantitative measures, mixed methods that combine traditional SNA with qualitative data analysis can also be used to inform the SNA research design as well as to interpret findings [22, 23]. Using qualitative methods, such as thematic or discourse analysis, can provide context and meaning to quantitative SNA findings. While quantitative SNA can uncover relational patterns, qualitative methods can help interpret quantitative findings by answering how and why social connections form [23].

Needless to say, SNA can serve as a research toolbox with which to explore a wide range of social phenomena. This includes research on illicit drugs. The SNA approach is useful for the study of illicit drugs because it directly incorporates an important driver of drug market involvement—social relationships. For instance, drug use networks have structural characteristics that can be uncovered to aid in the understanding of HIV transmission. Risk behaviours may concentrate around core members who may later spread disease to those located in the periphery [24] and individuals who act as “brokers” (high in betweenness centrality) may be responsible for infecting other network members by bridging otherwise unconnected people [25]. Drug use networks may also have key individuals (articulation points) that connect people in the periphery of a network with harm reduction resources and information [26]. Drug markets can also be mapped using community detection methods to identify clusters of vendors and buyers that would otherwise go unnoticed [27]. In short, because drug use and drug policies affect and are affected by many aspects of society, such as public health [28], the environment [29], education [30], and the criminal justice system [31, 32], SNA can be a valuable approach to the study of these interconnected systems and the people within them. Such methods have already been applied to many aspects of illicit drugs research, including in the areas of public health, epidemiology, and criminology.

## Reviews on social network analysis in illicit drugs research

Thus far, reviews about illicit drugs and SNA have mapped out the literature within circumscribed disciplines (public health and criminology) and/or the focus has extended beyond illicit drugs to cover other types of drugs and populations. We identified seven published reviews of SNA and its application within illicit drugs research, in each case within a specific field or topic in public health or criminology. Three of the reviews focused exclusively on illicit drugs [33–35], while the rest studied other topics and populations in addition to illicit drug use or people who use drugs (e.g., tobacco use, sex workers, etc.). In the field of public health, three reviews narrowly focused on a variety of drug use and social network features among adolescents [36–38] and another three covered disease risk and transmission. For example, Jacobs et al. [37] analyzed the role of gender in adolescent use of alcohol, tobacco, and other drugs and found that sex composition in networks is rarely considered. In another systematic review, Henneberger et al. [36] focused on dynamic SNA, which captures changes over time, to understand peer selection and socialization in adolescents who use substances, noting that very few studies include adolescent drug use in their analyses. Similarly, Montgomery et al. [38] looked more broadly at studies about adolescent health behaviours, including illicit substance use, and found that adolescents tended to connect with peers that had similar health behaviours and that popularity, was associated with harmful health behaviours within adolescent social networks.

An additional three reviews focussed on the role of social networks in infectious disease prevention, risk, and/or transmission among people who use drugs. De et al. [33] analyzed 58 studies and reported that network structure and composition, as well as behavioural roles, can all impact drug equipment sharing among people who inject drugs. A more recent systematic

review examined the literature on social support and HIV risk behaviours across different populations, including people who use drugs [39]. The authors did not find a consistent pattern across published studies in the association between social support and HIV risk behaviours in people who use drugs. Ghosh and colleagues [34] conducted a systematic scoping review of studies that used SNA and social network-based interventions to study HIV prevention and treatment in people who use drugs. The authors found that, in the area of HIV prevention and treatment, SNA had been mainly used as a secondary or exploratory method to uncover hidden populations, describe a network of relationships, or generate variables for further analysis.

In criminology, one systematic review published in 2017 contained 34 studies that used SNA to investigate organized crime groups involved in drug trafficking [35]. Among several key findings, SNA helped identify key individuals in a criminal network, and also showed that networks can adapt to increased law enforcement surveillance. While the use of SNA in criminology has arguably become “mainstream” [40], this is the only published review and assessment of existing literature on a topic related to drug crimes and the use of SNA.

In sum, these various reviews have lacked a focus on sociometric or whole network SNA in illicit drugs research across different disciplines. The current review aims to fill this gap by scoping the literature that uses SNA to study sociometric or whole networks (as opposed to ego or individual networks) related to illicit drugs to date. We focused on sociometric or whole network analysis because we were interested in understanding how SNA could be used to study social structures. While ego networks study the individual and their connections “in isolation from the structure of the network as a whole” [10], whole network analysis allows for the study of all connections within a bounded social sphere. Because the latter analysis focuses on the network in which individuals are embedded, data collection is often difficult: researchers must establish a network’s boundaries to identify all network members and their respective connections [41]. Whole network analysis can thus be extremely valuable in providing both a bird’s eye view of a social group, as well as individual perspectives, when researchers have access to the necessary data and sampling techniques. Drugs research spans a number of disciplines (eg., public health, economics, sociology, criminology). As such, there is a gap in the literature which examines the use of SNA across different disciplinary area. The study aims were to 1) provide an overview of whole network SNA methods used in illicit drugs research across disciplines, and 2) to describe the topics or study domains that have been covered to date using whole network methods. In addressing these study aims, we conclude by discussing the future of SNA in the field of illicit drugs research by identifying research gaps and opportunities for future studies.

## Methods

The current study followed Arksey and O’Malley [42] and Levac et al. [43] guidelines to conduct a scoping review, which consist of five required stages (described below) and an optional stakeholder consultation stage (the latter not employed here); further, to improve reporting quality, a PRISMA for Scoping Reviews Checklist (PRISMA-ScR) [44] is included in [S1 Checklist](#). Whereas systematic reviews are ideal for collecting all existing literature on a topic and critically synthesizing results, often to inform practice, scoping reviews are useful tools when the main goal is to provide a rapid overview of a body of literature. Our aims were to provide a general overview of how sociometric or whole network SNA has been used in illicit drugs research across a variety of academic fields by describing the SNA methods used (in terms of data sources and collection tools, sample type, types of ties or connections among social actors, and analysis type), identifying the main topics in the literature, and discussing potential future research directions and gaps. A scoping review is therefore best aligned with the purposes of our study [45].

To find articles that were concerned with illicit drugs and referred to or used SNA, we searched six databases: Web of Science, ProQuest Sociology Collection, Political Science Complete, PubMed, Criminal Justice Abstracts, and PsycINFO. These databases were selected to encompass a variety of academic disciplines, given that SNA can be used as a method across the social sciences. The search process was iterative; different combinations of search terms were tried by two of the authors (NZ & AD) and later discussed by the entire research team (NZ, AD, MB, AR, AG). Ultimately, the following keywords were used to search for relevant titles, abstracts, and article keywords: (("illegal drug\*") OR ("illicit drug\*") OR ("illicit substance\*") OR ("illegal substance\*") OR (opioid\*) OR (narcotic\*) OR ("injection drug use") OR ("people who use drugs") OR ("drug user\*") OR ("drug traffick\*") OR ("drug deal\*") OR ("drug\* supply") OR ("drug\* market") OR ("harm reduction") OR ("harm minimization") OR (overdos\*) OR ("peer support") OR ("peer worker\*") OR ("recovery peer\*")) AND ("network\* analys\*"). The final search strategy for Web of Science can be found in [S1 Appendix](#). All searches were conducted between April 1<sup>st</sup> and April 8<sup>th</sup> 2022 by two research assistants (NZ and AD) who met regularly to discuss the search results. In total, the search returned 532 studies. After we removed duplicates, 237 unique studies remained and were saved in an Excel spreadsheet to assess whether they met the inclusion criteria.

All authors discussed inclusion and exclusion criteria several times. This approach was an iterative process [43]; inclusion and exclusion criteria changed and adapted to ensure the review would meet our research aims. No restrictions were placed on place of publication or publication status (government reports and theses were included). Further, because the current study focusses on whole network analyses across multiple disciplines we did not restrict publication date. To be included, studies had to be written in English, focus on illicit drugs, and use SNA as one of their methods. Studies that were about legal substances (alcohol, tobacco, e-cigarettes, prescription drugs, or other medications) ( $n = 37$ ) or which were not about drugs at all were excluded ( $n = 11$ ). Cannabis was considered an illicit substance due to still being illegal in most countries. Further, to be considered as SNA, studies had to have collected social network data systematically by establishing connections between individuals and/or organizations (i.e., asking participants whom they interacted with or coding interactions for people using court documents). Studies that mentioned networks without systematically collecting social network data were excluded ( $n = 3$ ). This decision was based on the many ways in which the terms "social networks" can be used in the literature, but which do not strictly follow SNA data collection and analysis methods.

We also placed restrictions on the types of networks that could be included. First, studies about illicit drugs had to use sociometric or whole SNA as one of their methods [10]. Sociometric studies are ones that focus on the social structure of networks as a whole, such as capturing data on an entire drug trafficking organization or the social connections of a group of people who use drugs. Articles where SNA was used to study ego networks (i.e., networks of individual agents from their perspective as opposed to a whole network) were excluded ( $n = 21$ ) [e.g., 46, 47]. Second, actors represented people or organizations, and the ties had to be social in nature (e.g., interactions, communication, criminal collaboration, sex, drug sharing, etc.). We excluded networks that did not meet these criteria ( $n = 74$ ) (e.g., molecular networks, semantic networks, genetic networks, disease networks, brain networks, ecological networks, comorbidity networks, symptom networks, correlation networks, bibliography and co-citation networks, thematic networks, trafficking route networks). Finally, studies that used the same dataset in separate publications were treated as individual instances if the authors used the data in different analyses or to answer different research questions from those of previous studies.

Following refinement of our search terms and strategy, the titles and abstracts of all 237 studies were reviewed against the inclusion criteria by two of the authors (AD and NZ) who

regularly met to discuss their progress and resolve disagreements. We identified 50 studies as potentially relevant after the title and abstract review. An additional 22 studies were identified by reviewing the reference list of 10 randomly selected studies of similar published reviews [33, 35, 39], and by including articles already known to the authors, which included grey literature such as government reports and theses (no specific grey literature databases were used, however). In total, after a full-text review, 72 studies were included in the final body of texts for analysis (Fig 1).

A data-charting form was developed collaboratively by all authors to extract the content of the studies based on the study aims. Examples of data extracted included year of publication, data sources, sampling methods, and types of analyses. Three of the authors (AD, AG, and NZ) individually read and extracted information from five randomly selected studies and met twice to discuss the coding and revise the charting criteria. All authors discussed these changes and approved the subsequent charting form. Following Levac et al. [43], data were then extracted from all studies by two co-authors (NZ & AD) who met weekly to discuss their progress and any disagreements in coding. Whenever a disagreement occurred, the two authors discussed their differences and proposed solutions. For instance, the coders initially disagreed

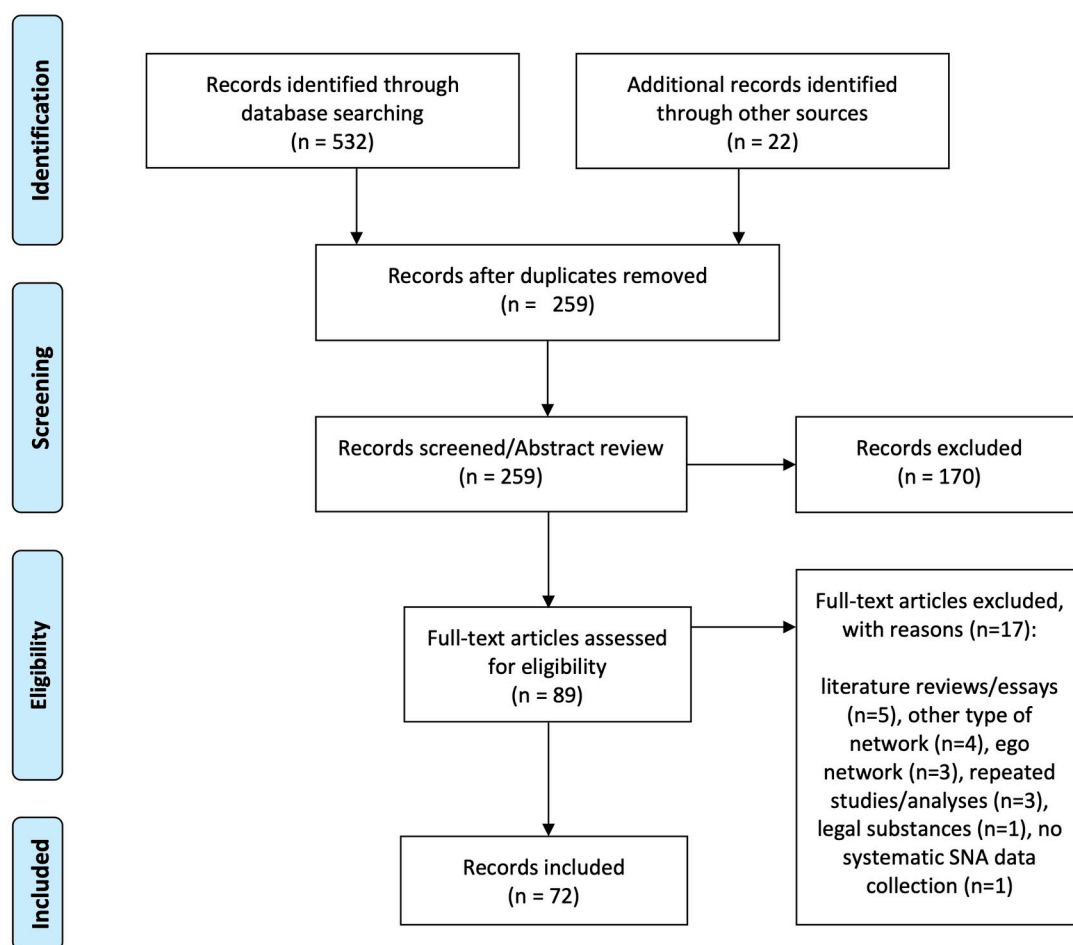

**Fig 1. PRISMA 2009 flow diagram.** Study selection process. From: Moher D, Liberati A, Tetzlaff J, Altman DG, The PRISMA Group (2009). Preferred Reporting Items for Systematic Reviews and Meta-Analyses: The PRISMA Statement. PLoS Med 6(7): e1000097. doi:10.1371/journal.pmed1000097 For more information, visit [www.prisma-statement.org](http://www.prisma-statement.org).

<https://doi.org/10.1371/journal.pone.0282340.g001>

about how to code sampling techniques when no specific technique was mentioned. Upon discussion, the coders agreed that studies that did not name a particular sampling technique, such as snowball or purposive sampling, should be coded as “unspecified.” The codebook was then changed to the agreed upon definition and any previously coded data were revised to ensure the new changes were implemented. A third author (AG) was also consulted periodically to discuss major disagreements, if any, and resolve them. Through this process, the charting criteria continued to evolve to ensure the best available and relevant information was gathered. The list of included variables and the final data-charting form can be found in the [S2 Appendix](#) and [S1 Dataset](#)).

Our analysis of the studies’ methods and topics consisted of extracting both quantitative and qualitative patterns. We followed Levac et al.’s [43] advice to use a qualitative approach to develop categories to describe the studies reviewed. We collaboratively identified study domains using Excel and NVivo 12 [48] and conducted three rounds of coding to sort and analyze the data. The study domains were developed with the research aims in mind and followed a combination of deductive and inductive analysis. Two of the authors (NZ and AD) discussed and developed an initial list of three overarching study domains as they read and coded all the articles: criminal networks, networks of people who use drugs, and institutional networks. One researcher (NZ) then read the studies’ abstracts two times to refine the study domains or topic areas by creating subcategories for each domain. The study domains and their subcategories presented here are descriptive rather than interpretive, in line with the objectives of a scoping review.

In the findings section, we first present a descriptive quantitative summary of the studies’ characteristics and methods, followed by a narrative description of the main topics found in the studies. Last, we conclude by identifying research gaps and discussing the implications of our findings for future illicit drugs research.

## Findings

### Summary of studies

[Table 1](#) presents a summary of all studies included in the scoping review. Year of publication ranged from 1997 to 2021, with a median of 2013, indicating that half of illicit drugs studies that use SNA were published in the past decade. Most studies’ samples were from the Global North or from multiple countries: 27 were from the U.S. (37.50%), 17 from multiple countries or online samples (23.61%), seven from Australia (9.72%), and six from Canada (8.33%).

Studies’ data collection strategies were coded as either primary or archival/secondary. Studies that collected data by asking participants about their connections, such as in interviews or surveys, were coded as primary sources. Networks coded from pre-existing documents or data, such as court records, were coded as archival/secondary sources. As seen in [Table 1](#), most of the studies used data collected from archival/secondary sources ( $n = 46$ ; 63.9%) and the remaining studies used primary sources ( $n = 27$ ; 29.2% except for four studies that combined both (5.56%). Specifically, network data were collected mainly from pre-existing official, legal, or government documents ( $n = 46$ ; 63.9%) and questionnaires ( $n = 19$ ; 26.4%). Some of the studies in our review used data from the same research project, such as SNAP (Social Networks among Appalachian People) ( $n = 5$ ; 6.9%) and the Project Caviar dataset ( $n = 5$ ; 6.9%). Researchers used these datasets to answer different research questions, and all were used for separate studies.

In most studies, a sampling technique was not specified ( $n = 55$ ; 76.4%). These studies mostly used pre-existing documents to map full networks and, as such, simply included all actors in the documents as their sample. Studies that use archival data have little choice in

Table 1. Summary of studies included in scoping review (n = 72).

|                                                 | n  | (%)   |
|-------------------------------------------------|----|-------|
| <b>Country of sample</b>                        |    |       |
| US                                              | 27 | 37.50 |
| Multiple countries/online sample                | 17 | 23.61 |
| Australia                                       | 7  | 9.72  |
| Canada                                          | 6  | 8.33  |
| UK                                              | 2  | 2.78  |
| Colombia                                        | 2  | 2.78  |
| Turkey                                          | 2  | 2.78  |
| Brazil                                          | 1  | 1.39  |
| Lithuania                                       | 1  | 1.39  |
| Iran                                            | 1  | 1.39  |
| Serbia                                          | 1  | 1.39  |
| Spain                                           | 1  | 1.39  |
| Sweden                                          | 1  | 1.39  |
| Greece                                          | 1  | 1.39  |
| Italy                                           | 1  | 1.39  |
| Uruguay                                         | 1  | 1.39  |
| <b>Year of publication</b>                      |    |       |
| Before 2000                                     | 3  | 4.17  |
| 2000–2010                                       | 18 | 20.83 |
| 2011–2020                                       | 45 | 62.50 |
| 2021 (Present)                                  | 6  | 12.50 |
| <b>Data collection year</b>                     |    |       |
| Before 2000                                     | 16 | 22.22 |
| 2000–2010                                       | 31 | 43.06 |
| 2011–2020                                       | 15 | 20.38 |
| Unknown/incomplete                              | 10 | 13.89 |
| <b>Data sources</b>                             |    |       |
| Primary                                         | 21 | 29.17 |
| Archival/secondary                              | 46 | 63.89 |
| Both primary and archival                       | 4  | 5.56  |
| Unknown/incomplete                              | 1  | 1.39  |
| <b>Data collection tool<sup>1</sup></b>         |    |       |
| Prosecution/legal/police files                  | 46 | 63.89 |
| Questionnaire                                   | 19 | 26.39 |
| Structured and semi-structured interviews       | 8  | 11.11 |
| Websites/forums/social media                    | 3  | 4.17  |
| Media/books/news                                | 6  | 8.33  |
| Observations                                    | 4  | 5.56  |
| Unknown/incomplete                              | 1  | 1.39  |
| <b>Reported sampling technique</b>              |    |       |
| Snowball or chain-referral sampling             | 16 | 22.22 |
| <i>Respondent-driven sampling</i>               | 8  | 11.11 |
| Purposive sampling                              | 1  | 1.39  |
| Specific technique unspecified/incomplete       | 55 | 76.39 |
| <b>Sample</b>                                   |    |       |
| People/groups who sell/distribute/traffic drugs | 44 | 61.11 |

(Continued)

Table 1. (Continued)

|                                                                               | n  | (%)   |
|-------------------------------------------------------------------------------|----|-------|
| People who use drugs and also sell drugs                                      | 2  | 2.78  |
| People who use(d) drugs                                                       | 20 | 27.78 |
| Institutions/service providers/policymakers                                   | 6  | 8.33  |
| Datasets used in multiple studies                                             |    |       |
| SNAP (Social Networks among Appalachian People)                               | 5  | 6.94  |
| Project Caviar                                                                | 5  | 6.94  |
| Operation Springtime                                                          | 3  | 4.17  |
| Operations Chalonero and Stupor Mundi                                         | 3  | 4.17  |
| SFHR (Social Factors for HIV Risk)                                            | 2  | 2.78  |
| Meth World                                                                    | 3  | 2.78  |
| Natarajan (2000) cocaine trafficking organization                             | 2  | 2.78  |
| Natarajan (2006) heroin dealing organization                                  | 2  | 2.78  |
| Turhal's (2017) Turkish Anti-Smuggling and Organized Crime Department dataset | 2  | 2.78  |
| Ties                                                                          |    |       |
| Communication                                                                 | 19 | 26.39 |
| Co-offending                                                                  | 20 | 27.78 |
| Drug transactions                                                             | 4  | 5.56  |
| Social support, friendships, acquaintances                                    | 13 | 18.06 |
| Collaboration or resource exchange                                            | 14 | 19.44 |
| "Risky" relationship (drug partner and/or sex partner)                        | 12 | 16.67 |
| Other (peer education/advocacy, conflict, Twitter followers/retweets)         | 6  | 8.33  |
| Analysis type                                                                 |    |       |
| Quantitative inferential/predictive                                           | 48 | 63.89 |
| Multivariable statistics                                                      | 17 | 22.22 |
| Bivariate statistics                                                          | 18 | 23.61 |
| Other                                                                         | 12 | 16.67 |
| Quantitative descriptive                                                      | 15 | 20.83 |
| Qualitative analysis                                                          | 1  | 1.39  |
| Both qualitative and quantitative methods <sup>2</sup>                        | 8  | 13.89 |
| Quantitative analysis complemented by description of qualitative data         | 4  |       |
| Mixed methods (qualitative analysis and quantitative analysis)                | 4  |       |
| Relevant quantitative analytical methods <sup>1</sup>                         |    |       |
| Network measures                                                              | 67 | 93.06 |
| Network visualizations                                                        | 59 | 81.94 |
| Community detection                                                           | 14 | 19.44 |
| ERGM                                                                          | 5  | 6.49  |
| Main network measures                                                         |    |       |
| Centrality measures                                                           |    |       |
| Degree centrality                                                             | 52 | 72.22 |
| Betweenness centrality                                                        | 39 | 54.17 |
| Closeness centrality                                                          | 12 | 16.67 |
| Eigenvector centrality                                                        | 9  | 12.50 |
| Centralization measures                                                       |    |       |
| Degree centralization                                                         | 16 | 22.22 |
| Betweenness centralization                                                    | 6  | 8.33  |
| Closeness centralization                                                      | 3  | 4.17  |
| Eigenvector centralization                                                    | 1  | 1.39  |

(Continued)

**Table 1.** (Continued)

|                                                                                            | n  | (%)   |
|--------------------------------------------------------------------------------------------|----|-------|
| Density                                                                                    | 32 | 44.44 |
| Community detection (cliques, core-periphery, components, k-cores, clustering coefficient) | 34 | 47.22 |

<sup>1</sup> Some studies used more than one data collection tool so the percentage for these categories may add up to more than 100%.

<sup>2</sup> Studies that reported using qualitative analysis but did not specify how qualitative data were analyzed were coded as “quantitative analysis complemented by description of qualitative data”.

<https://doi.org/10.1371/journal.pone.0282340.t001>

terms of the sampling process, given that the data were collected for other purposes. Of the studies that mentioned a specific sampling technique, most used chain-referral or snowball methods ( $n = 16$ ; 22.2%). Snowball or chain-referral sampling methods are particularly useful when attempting to map a network with unknown boundaries, where researchers do not know a priori who belongs to the group and who does not [41]. In such cases, people are recruited if they meet a set of criteria and they, in turn, refer other potential participants with whom they have social ties. This type of sample is non-random, but there are methods to make up for the lack of randomness. For example, respondent-driven sampling is a popular type of chain referral sampling that uses participant incentives to recruit unbiased samples. Eight studies (11.1%) employed respondent-driven sampling, which is particularly well suited to uncover hidden networks [49]. In terms of the sampled populations, most studies sampled people or groups who sold, distributed, or trafficked drugs ( $n = 44$ ; 61.1%) or people who use(d) drugs ( $n = 20$ ; 27.8%).

The analytic approach for SNA was coded into four categories: quantitative inferential/predictive analysis, quantitative descriptive analysis, qualitative analysis, or a combination of both quantitative and qualitative methods. Most studies used quantitative inferential/predictive analyses ( $n = 46$ ; 63.9%), which involved conducting a variety of statistical, mathematical, or computational analyses, from t-tests to exponential family random graph models (ERGM); half of these studies used bivariate inferential statistics ( $n = 17$ ; 23.6%) (i.e., one dependent variable and one independent variable as opposed to multiple independent variables and at least one dependent variable). Fifteen studies used quantitative descriptive analyses (20.8%), which described network data using network graphs and/or variables (e.g., centralization) but did not conduct any statistical analysis. In terms of specific quantitative analytical methods, most studies reported at least one network measure, such as effective size, degree centrality, or betweenness centrality ( $n = 67$ ; 93.1%). Beyond basic network measures, some studies also tested innovative algorithms or employed new quantitative methods to analyze SNA [50, 51].

Interestingly, eight studies reported using both quantitative and qualitative analysis to shed light on network dynamics that would be difficult to uncover from quantitative data alone. Four studies used qualitative data analysis like content or narrative analysis together with quantitative methods. However, the remaining four studies in this category lacked information on how qualitative data were analyzed; [52–55] instead, qualitative data like interviews and documents were used only descriptively to complement quantitative findings by citing interview excerpts or summarizing evidence from police files. Finally, one study used only qualitative analysis [56]; specifically, the authors used qualitative content analysis to analyze data obtained through ethnographic observations, focus groups, and in-depth interviews.

Finally, Table 1 shows some of the most commonly used network measures (for more detail, the table in S1 Dataset contains specific information for all the network measures used

by each study in the sample and [S2 Appendix](#) contains the definitions for each measure). Centrality measures such as degree, betweenness, closeness, and Eigenvector, are used to identify important or central individuals within a full network. Degree centrality, which is a simple measure of the number of individuals each network member is connected to, is the most commonly used in the current sample ( $n = 54$ ). Betweenness centrality is also seemingly popular ( $n = 39$ ); it identifies people who act as “bridges”, connecting otherwise unconnected network members. The other measures used in sociometric network studies are more focused on describing tendencies or patterns of the networks as a whole. Degree centralization, which measures how centralized a whole network is around one or few important individuals with many connections, is also frequently used ( $n = 16$ ). However, other measures of network centralization, such as betweenness, closeness, and Eigenvector centralization, were rarely employed to analyze full networks in the current sample. Similarly, density and community measures were quite common. Density, which shows how many connections exist in a network out of all possible connections, were used in 32 studies. Finally, measures and algorithms can be used to identify communities or subgroups in a network, as reflected in 34 studies.

### Qualitative description of study domains

We identified and divided the studies reviewed into three domains of study: (1) the study of crime: drug trafficking or distribution networks, (2) public health and social support: the social networks of people who use drugs, and (3) policy, law enforcement, and service providers: institutional and policymaking networks. These study domains and their corresponding subcategories (see [Table 2](#)) present an overview of the topics covered in illicit drugs research that uses whole network SNA. Some studies belonged to more than one study domain. Similarly, most studies contained elements of several, if not all, subcategories within their respective domain to varying extents. Subcategories describe the topics covered in each domain and help explain how SNA has specifically been used for each topic.

In [Table 3](#), we also show how different networks measures were used across study domains. Studies that were categorized under the first study domain tended to use centrality measures (degree, betweenness, closeness, and eigenvector centrality) more than any other network measure (e.g., 98% used degree centrality). Study domain 1 contains studies about drug trafficking organizations, which often aim to identify key actors for network intervention or disruption by law enforcement. Studies about policy, law enforcement, and service providers in domain 3 also tended to favour centrality measures, especially degree (100%) and betweenness centrality (62.5%). Studies in domain 2, focused on public health and social support, were most likely to use degree centrality (50%) to identify important actors in a network. In all study domains, measures used to identify communities or subgroups were similarly common: about half of the studies in each domain employed these measures. Global measures such as

**Table 2. Summary of study domains, subcategories and corresponding studies.**

| STUDY DOMAIN                                                                               | SUBCATEGORIES                                                                                       | STUDIES                             |
|--------------------------------------------------------------------------------------------|-----------------------------------------------------------------------------------------------------|-------------------------------------|
| 1. The study of crime: drug trafficking or distribution networks                           | 1.1 Resilience and disruption<br>1.2 Collaboration<br>1.3 Comparison of different types of networks | [27, 50, 51, 53–55, 57–98]          |
| 2. Public health and social support: the social networks of people who use drugs           | 2.1. Comparisons based on drug choice and drug use patterns<br>2.2 Disease risk and transmission    | [24–26, 53, 56, 58, 91, 99–115]     |
| 3. Policy, law enforcement, and service providers: institutional and policymaking networks | -                                                                                                   | [52, 53, 59, 68, 77, 106, 116, 117] |

<https://doi.org/10.1371/journal.pone.0282340.t002>

Table 3. Frequency of measures by study domain.

| Network measure                                                                           | Study domain 1: The study of crime (n = 49) | Study domain 2: Public health and social support (n = 24) | Study domain 3: Policy, law enforcement, and service providers (n = 8) |
|-------------------------------------------------------------------------------------------|---------------------------------------------|-----------------------------------------------------------|------------------------------------------------------------------------|
| Degree centrality/average degree                                                          | 48 (98.0%)                                  | 12 (50.0%)                                                | 8 (100%)                                                               |
| Betweenness centrality/average degree                                                     | 36 (73.5%)                                  | 4 (16.7%)                                                 | 5 (62.5%)                                                              |
| Closeness centrality/average closeness                                                    | 10 (20.4%)                                  | 2 (8.3%)                                                  | 2 (25.0%)                                                              |
| Eigenvector centrality/average eigenvector                                                | 7 (14.3%)                                   | 3 (12.5%)                                                 | 1 (12.5%)                                                              |
| Degree centralization                                                                     | 14 (28.6%)                                  | 3 (12.5%)                                                 | 1 (12.5%)                                                              |
| Betweenness centralization                                                                | 5 (10.2%)                                   | 0 (0.0%)                                                  | 0 (0.0%)                                                               |
| Closeness centralization                                                                  | 3 (6.1%)                                    | 0 (0.0%)                                                  | 0 (0.0%)                                                               |
| Eigenvector centralization                                                                | 1 (2.0%)                                    | 0 (0.0%)                                                  | 0 (0.0%)                                                               |
| Density                                                                                   | 24 (49.0%)                                  | 7 (29.2%)                                                 | 0 (0.0%)                                                               |
| Community measures (cliques, core-periphery, components, k-cores, clustering coefficient) | 23 (46.9%)                                  | 11 (45.8%)                                                | 5 (62.5%)                                                              |

<https://doi.org/10.1371/journal.pone.0282340.t003>

density and centralization were not as common as centrality and community measures, with the exception of study domain 1 where half of the studies included density. Overall, degree centrality, density, and various community measures were the most commonly used across all study domains. Further, studies about crime and drugs were the most likely to use centralization measures to describe whole networks.

### Study domain 1

**The study of crime: Drug trafficking or distribution networks.** Broadly speaking, studies on drug crime networks shed light on the composition of networks involved in drug dealing or trafficking, both in terms of structural organization and individual roles within groups. Some studies focused on resilience and disruption and used SNA to assess how drug-related criminal networks, such as drug trafficking organizations or online drug markets, evolved over time, reacted to change, or identified points of disruption [e.g., 27, 61, 63, 73, 81, 86, 90, 118]. For example, Ünal [90] compared the structure of illicit drug trafficking networks against narco-terror networks using network measures to assess whether they prioritized a dense and efficient structure with visible central players or a more secure structure with short paths of information flow and small subgroups of trusted connections. Similarly, O'Reilly et al. [86] used longitudinal SNA to analyze the resilience and adaptability of a drug trafficking network in Australia over five time periods as they faced drug supply changes.

Studies in this study domain also highlighted the use of SNA in examining collaboration among people and groups committing drug-related crimes. Research on collaboration and co-offending highlight the social aspect of drug-related criminal networks. Visualizing a criminal group as a network, rather than as separate individuals, can allow researchers to understand the formation of criminal networks or organizations and help predict future intra- and inter-group conflict. Among studies reviewed, SNA was used to map networks of co-offending *within* drug markets and trafficking organizations [69, 70, 75], as well as to map interactions *between* groups or organizations [87, 88]. Looking at co-offending within groups, Heber [69] analyzed a network of co-offenders involved in drug crimes in Stockholm to investigate its structure, assess co-offending stability over time, and identify central members using descriptive network measures. At the between-group level, a doctoral dissertation presented an analysis of gang alliances and rivalries in the U.S., emphasizing the role of ethnicity, using open-source data, as well as descriptive network measures and community detection [87].

Identifying key players and central members was also an important part of understanding criminal networks and developing disruption strategies [e.g., 58, 61, 67]. Most of these studies proposed that using SNA can help agencies improve their targeting strategies, especially compared to policing methods not driven by data. Using data from criminal groups involved in cocaine trafficking, Gimenez-Salinas (2014) identified key players using degree and betweenness centrality and compared it to official police data. Basu and Sen [58] analyzed drug trafficking and terrorist groups to compare the traditional network approach of detecting key actors using centrality measures against a new proposed approach based on the mathematical concept of “identifying codes.” This model was developed to reduce the amount of resources needed to monitor network members compared to using standard centrality measures.

Overall, studies on drug-related criminal networks either aimed to understand how drug trafficking worked or to help law enforcement agencies improve their effectiveness in disrupting drug trafficking organizations and criminal groups. Both aims are not necessarily independent of each other: a better understanding of collaboration in drug trafficking networks may help identify points of vulnerability in these networks. The demonstration sometimes remains purely quantitative or in the realm of simulations; none of these articles, however, can truly answer questions on whether turning to SNA can be done while respecting criminal justice principles of fairness and proportionality. Yet, the potential of SNA to add new information on drug trafficking and distribution is relatively clear.

## Study domain 2

**Public health and social support: The social networks of people who use drugs.** The second study domain that we identified consists of whole network SNA research about people who use drugs and their social connections. Such studies were concerned with the effects of different types of social support or the role of peer influence (e.g., family, friendship, other people who use drugs) on specific behaviours or drug use patterns. For instance, Silva et al. [56] used network visualizations and qualitative content analysis to investigate the networks of social support for a sample of people who used crack cocaine and received support from a health program in Brazil. Another example is Arimoto [99], who examined the effects of peer influence on substance use—including alcohol, marijuana, and other “illegal/unauthorized” drugs like cocaine and methamphetamine—using ordered logistic regression but focused exclusively on adolescents. While all studies about the social networks of people who use drugs stressed the value of researching social support and peer influence using SNA at large, they also demonstrate how SNA can be used within three specific categories of interest: harm reduction diffusion, comparing social support and behaviour based on drug use patterns, and studying disease risk and transmission.

First, studies of networks about public health and social support illustrated the importance of social relationships on harm reduction behaviours or service access. These studies demonstrated how SNA can be used to study the diffusion of information and behaviour across a social network in a variety of contexts, as well as shed light on the importance of different social ties. Using SNA, Bouchard et al. [26] aimed to identify “harm reduction champions”—i.e., key network articulation points—who could effectively share harm reduction information across a network of people who use drugs. Along similar lines, Rudolph et al. [119] uncovered the minimum number of peer educators needed to reach at least half of the network of a sample of people who use drugs who visited high-risk sites. The authors used SNA and spatial data of people who use drugs to examine the association between overdosing or having connections to someone who had overdosed and individual and network level variables. Further, a study by Kwan et al. [120] looked at harm reduction services access; they assessed the importance of

social relationships and methadone dosage on participation patterns in a low-threshold methadone treatment program in Hong Kong using bivariate statistics.

Second, a group of studies focused on comparing people's social networks based on drugs used or drug use patterns. Overall, these studies showed how SNA can uncover the differential impact of certain drugs on an individual's social relationships. Jonas et al. [104] compared the effective size of drug co-usage networks based on drug of choice (e.g., cannabis and OxyContin, among others) using multivariate statistical analysis. The network measure of effective size was used to measure social capital and identify differences based on drug of choice. Wendel et al. [91] used quantitative SNA, including ERGM, and software-assisted qualitative analysis of interview data to study methamphetamine users and sellers in New York City. The authors compared two submarkets, one composed of men who have sex with men and another one where methamphetamine use is not connected to participants' sexual activity. Interestingly, one study investigated disinformation about cannabis and opioids (e.g., morphine, heroin, fentanyl, oxycodone, etc.) during the Covid-19 pandemic using Twitter data and descriptive network measures along with community detection techniques [115], drawing comparisons of network structural measures and disinformation between Twitter networks surrounding the two types of drug.

Third, a final category of studies about public health investigated disease transmission and risk behaviours. These studies show how SNA methods can be a valuable tool to predict and prevent disease transmission among people who use drugs. By analyzing the structure of social networks, researchers can identify individuals most likely to be at risk, as well as study the effectiveness of interventions designed to decrease risk behaviours. For example, Young et al. [114] created a network of risk relationships for people who use drugs who shared injection equipment and/or had unprotected sex and explored how receiving an HIV vaccine could result in an increase in risk behaviours using bivariate statistics. Gyarmathy et al. [25] studied how structural position (e.g., betweenness centrality, degree centrality) of people who injected drugs predicted HIV infection in a network of friends and family that provided advice and favours or with whom participants used drugs. In an interesting study about SNA methods, Bell et al. [100] used network simulations to assess whether collecting only ego network data about people who inject cocaine from the perspective of individuals could produce accurate results for the study of disease transmission compared to whole network data.

Studies in this domain shed light on how SNA can uncover the social aspect of drug use. Understanding group processes such as disease and information transmission within a network can be greatly facilitated by whole network SNA methods by allowing researchers to identify the most effective points of intervention within a group.

### Study domain 3

**Policy, law enforcement, and service providers: Institutional and policymaking networks.** Unlike the previous two study domains which captured the relationships of drug trafficking networks and people who use drugs, research within the third domain is about relationships among drug enforcement institutions, service providers, or policymakers. Studies such as the ones described in this section illustrate how SNA can help identify service gaps and collaboration relationships between service providers for people who use drugs. For instance, Spear [53] investigated a network of substance use treatment programs and the effects of these relationships on the likelihood of patient readmission using both bivariate and multivariable statistical analyses, as well as qualitative data description. Similarly, Murfree [106] researched the inter-organizational network of recovery service providers in Tennessee, U.S with community detection techniques and descriptive network measures.

Other studies were conducted on networks related to drug enforcement institutions, such as police and drug courts. These studies demonstrate the ways in which SNA to not only understand drug enforcement institutions and their collaboration patterns, but it may also be a valuable tool to hold government institutions accountable for their actions and uncover corruption. For example, Koturovic [116] built a “state response network” composed of institutions tasked with suppressing organized crime and drug trafficking in Serbia to identify structural holes and assess these organizations’ effectiveness in combatting crime using descriptive network measures and community detection techniques. Looking at Colombia and Mexico, Garay-Salamanca and Salcedo-Albarán [68] used traditional SNA methods coupled with an innovative method called SNAID (Social Network Analysis for Institutional Diagnosis) to explain how criminal networks can affect democratic formal institutions. Furthermore, two studies looked specifically at court processes related to illicit drugs [52, 77]. Looking at both individuals and organizations, Shomade [52] used quantitative analysis along with qualitative data description of one criminal and one drug court in the U.S. to shed light on the court structure and processes, as well as identify central members. Masias et al. [77] used machine learning techniques and SNA to predict the verdict in the trial of a drug trafficking organization based in Canada.

Finally, one study looked specifically at how drug policies were created. The study of policymaking using SNA can help governments, as well as advocacy groups and individuals, identify areas of improvement, such as ensuring all affected groups are represented in the process or that important individuals in the network are not isolated from the core. The only example of such a study in drug policymaking is a dissertation written by Musto [117]. The author dedicated a chapter to conducting SNA on the policymaking process that led to the creation of cannabis regulations in Uruguay between 2011 and 2013 using descriptive network measures. In this chapter, the author also used narrative analysis of qualitative interviews conducted in earlier sections to inform and interpret SNA findings.

Ultimately, it is clear that this study domain is less developed than others and presents many opportunities for future research, particularly using SNA to help inform more effective drug policies or regulations and to promote accountability.

## Discussion

The current scoping review sought to describe and examine how whole network or sociometric SNA methods have been used in illicit drugs research to reflect on and discuss the ways in which such methods can be used for future research. Overall, our quantitative summary shows that such studies have grown in popularity in the last ten years (2010–2021), are mostly from the U.S., and use quantitative methods. Upon a closer analysis of studies, our findings also show that whole network SNA has been used in three main study domains: drug crimes, public health and social support, and, to a lesser extent, policy, law enforcement and service providers. Specifically, most studies were concerned with uncovering the social dynamics of drug trafficking organizations and exploring how the social networks of people who use drugs promote and/or decrease risk behaviours and harm reduction opportunities.

This scoping review highlighted the strengths of whole network SNA in its ability to map complex behaviours and social relationships, across multiple domains, with both quantitative and qualitative data analytic techniques. First, future research could explore different sampling techniques and use more diverse data sources, especially in attempting to specify network boundaries. Second, qualitative and mixed methods should be implemented to provide more context on mechanisms operating within networks. Last, the third study domain could be expanded by studying drug policymaking networks and emphasizing the interconnectedness of all three study domains. We discuss each of these below.

First, it is important to consider the extent to which whole network studies truly and accurately represent a full network. Determining a network's boundary—i.e., who belongs and who does not—is a key step in any whole network study that aims to map an entire group [41]. Ideally, networks should be mapped in their entirety when the population under study is known *a priori*; in this case, the boundaries are determined by the relationships or ties among the known members of the network. However, in practice, this is not always feasible, particularly when studying “hidden” or hard-to-reach populations, such as people who use drugs, drug trafficking groups, or policymakers. In these cases, boundaries may be difficult to establish, either because a group's members are not publicly known, members may be reluctant to identify themselves as such and participate, or they may be hard to find. Snowball or chain-referral sampling methods are particularly useful when attempting to map a network with unknown boundaries [41], such as the ones used in a few of the studies in the current review. While there are several ways to approach sampling, network boundaries are likely to be constrained by the data sources available to researchers. In this sense, whole networks may not be necessarily “whole” and the resulting network measures may not be reliable if important data are missing or access to data is restricted.

Studies about criminal networks relied heavily on archival sources and studies about networks of people who use drugs tended to use questionnaires. Both types of data sources can be useful in uncovering networks of drug trafficking or people who use drugs; however, over-relying on a single data source may result in ignoring other types of networks or connections, leading to networks that may not be truly “whole” and may be missing key actors and ties. Future illicit drugs research could benefit from exploring the use of different data sources, such as autobiographies [121] or observations [52]. For example, studies about drug trafficking organizations could attempt to map full networks by interviewing known members to complement archival data provided by official government sources. We also found a lack of diversity in populations sampled: most studies used data from the Global North, echoing findings from previous systematic reviews by Bichler et al. [35] and De et al. [33], who found an overrepresentation of Western consumer countries with key positions in global trade and a lack of data on people who inject drugs from the Global South, respectively. Future illicit drugs research could explore social network structures and dynamics involved in drug use, drug crimes, drug enforcement, and drug policy in different countries with a variety of populations.

Second, our findings suggest that there is a lack of qualitative and mixed methods in whole network SNA research about illicit drugs across disciplines. This could be in part due to having included only studies that utilized systematic SNA data collection (i.e., asked specifically about social connections and did not use the concept as an analogy or metaphor), for which quantitative analysis is a better fit. However, illicit drugs researchers using quantitative methods could take advantage of and further refine the applicability of qualitative methods in quantitative SNA, which scholars have argued can provide important context and rich information [22, 122].

Last, the findings reveal that the third study domain remains largely unexplored: we found little SNA research about institutions, organizations, and individuals that create and enforce drug policies, especially as it concerns drug policymaking and inter-agency collaboration (e.g., between local and federal police, across different levels of government, etc.). Specifically, there was only one example of how whole network SNA methods can be used to study drug policymaking networks to date [117], but examples of SNA to study policymaking from other fields can serve as a starting point for the study of illicit drug policymaking. For example, policy network analysis has been used to study public health policymaking processes [123, 124], as well as environmental [125] and transport policies [126]. The use of SNA to study drug policymaking and institutional networks can reveal otherwise invisible dynamics about policymaking at

different levels (e.g., individual and institutional), which can help create more effective and fair policies by increasing collaboration and identifying groups that are underrepresented in the policymaking process.

SNA research on drug policy is an important study domain on its own, but it must also be explored because of the major impact it can have on drug trafficking organizations (study domain #1) and public health (study domain #2). Given rapidly changing drug policies, such as the legalization of cannabis in countries like Canada and Uruguay [127, 128] and the decriminalization of drug possession in small amounts in British Columbia, Canada [129], the impact of such policy changes on organized crime and public health can be explored from a whole network SNA angle. For instance, drug policies aimed at decriminalizing and/or regulating or legalizing drugs may have an impact on the structure and behaviour of large criminal organizations involved in drug trafficking. Whole network SNA can help answer questions related to how organized groups evolve and adapt to new policies: do they decrease their involvement in drug trafficking, or do they turn their attention to new drug markets? Similarly, decriminalization and/or legalization of drugs and its impact on law enforcement practices will in turn have an effect on public health and on the lives of people who use drugs. Changes in social support networks and harm reduction efforts can be studied using whole network SNA by looking at affected communities before and after policy changes. If drug policies fail to meet the needs of affected communities, policymaking studies using SNA can also help drug policy advocates generate change by identifying strategic points of influence in a drug policy network.

The current scoping review is not without limitations. Given the capacity and aims of our project, studies about legal substances, such as alcohol, tobacco, and prescription drugs were excluded; however, we did note ample research using SNA in this area in our original literature search. A future scoping and/or systematic review should be conducted on these topics. Additionally, many types of networks, not just social ones, can be analyzed, including genetic, neural, and semantic networks—these were excluded from the current review. Thus, a thorough review of the use of SNA in other disciplines, such as environmental science, communications, urban studies, and public policy, could offer unique and innovative insights that the field of illicit drugs research could draw on. It is also important to note the limitations inherent to a scoping review. Scoping reviews are not as exhaustive as systematic reviews and do not aim to make quality assessments of the existing literature [45, 130]. Thus, our findings represent only an initial and possibly non-exhaustive attempt at mapping out the literature across different fields that use SNA to conduct illicit drugs research to draw insights on the potential of these methods and areas for future illicit drugs research.

We conclude with the suggestion that SNA may be well suited to studying illicit drugs from a whole-of-system approach, which takes into account how the health, social, and criminal justice systems overlap and how people are positioned within them [131]. A systems perspective is also compatible with a social determinants of health framework, which proposes that health is influenced by many different individual and system-level factors, such as people's jobs, age, economic policies, and political regimes. These factors, in turn, can generate health inequities [132], as is the case for many people who use drugs who face different health barriers, such as structural racism, lack of social support, and lack of access to healthcare [133, 134]. Understanding all three study domains—people who use drugs, the criminal justice system, and drug policymaking—from a whole network perspective can help researchers visualize the different variables at all levels and across all systems that affect people who use drugs in specific contexts. No study thus far has taken this across-systems, multidisciplinary approach using whole network SNA methods in the area of illicit drugs research, creating a clear gap in the literature to address an issue as complex as illicit drugs.

## Supporting information

**S1 Checklist. Preferred Reporting Items for Systematic reviews and Meta-Analyses extension for Scoping Reviews (PRISMA-ScR) checklist.**

(PDF)

**S1 Dataset. Data-charting form.** Data-charting form used to extract information from included studies (n = 72).

(XLSX)

**S1 Appendix. Search strategy for Web of Science.**

(PDF)

**S2 Appendix. List of variables.** Variables included in the data-charting form and their definitions.

(PDF)

**S3 Appendix. Studies included in the scoping review (n = 72).**

(DOCX)

## Author Contributions

**Conceptualization:** Naomi Zakimi, Alissa Greer, Martin Bouchard, Alison Ritter.

**Formal analysis:** Naomi Zakimi, Alissa Greer, Martin Bouchard, Arshpreet Dhillon, Alison Ritter.

**Funding acquisition:** Alissa Greer.

**Investigation:** Naomi Zakimi, Arshpreet Dhillon.

**Methodology:** Naomi Zakimi, Alissa Greer, Martin Bouchard, Alison Ritter.

**Writing – original draft:** Naomi Zakimi.

**Writing – review & editing:** Naomi Zakimi, Alissa Greer, Martin Bouchard, Arshpreet Dhillon, Alison Ritter.

## References

1. Simmel G. *Sociology: Inquiries into the construction of social forms*. Leiden, Netherlands: Brill; 2009.
2. Freeman L. *The development of social network analysis: A study in the sociology of science*. Vancouver, Canada: Empirical Press; 2004.
3. Durkheim É. *The division of labour in society*. 2nd ed: London: Macmillan; 1984.
4. Tichy NM, Tushman ML, Fombrun C. Social network analysis for organizations. *Academy of management review*. 1979; 4(4):507–19.
5. Cross R, Borgatti SP, Parker A. Making invisible work visible: Using social network analysis to support strategic collaboration. *California management review*. 2002; 44(2):25–46.
6. Moreno JL. *Who shall survive?: A new approach to the problem of human interrelations*. Washington, D.C.: Nervous and Mental Disease Publishing Co.; 1934.
7. Jennings HH. *Leadership and isolation: A study of personality in inter-personal relations*: Longmans; 1943.
8. Moreno JL, Jennings HH. Statistics of social configurations. *Sociometry*. 1938:342–74.
9. Knoke D, Yang S. *Social Network Analysis*. Thousand Oaks, CA: SAGE; 2020.
10. Scott J. Social network analysis. *Sociology*. 1988; 22(1):109–27.
11. Marsden PV. Recent Developments in Network Measurement. In: Scott J, Carrington PJ, Wasserman S, editors. *Models and Methods in Social Network Analysis. Structural Analysis in the Social Sciences*. Cambridge: Cambridge University Press; 2005. p. 8–30.

12. Tischer D. Collecting network data from documents to reach non-participatory populations. *Social Networks*. 2022; 69:113–22. <https://doi.org/10.1016/j.socnet.2020.09.004>
13. Bloch A, Vasques Filho D, Bojanowski M. Networks from archives: Reconstructing networks of official correspondence in the early modern Portuguese empire. *Social Networks*. 2022; 69:123–35. <https://doi.org/10.1016/j.socnet.2020.08.008>
14. Campana P, Varese F. Studying organized crime networks: Data sources, boundaries and the limits of structural measures. *Social Networks*. 2022; 69:149–59. <https://doi.org/10.1016/j.socnet.2020.03.002>
15. Fleisher MS. Fieldwork research and social network analysis: Different methods creating complementary perspectives. *Journal of Contemporary Criminal Justice*. 2005; 21(2):120–34. <https://doi.org/10.1177/1043986204273436>
16. Stys P, Muhindo S, N'simire S, Tchumisi I, Muzuri P, Balume B, et al. Trust, quality, and the network collection experience: A tale of two studies on the Democratic Republic of the Congo. *Social Networks*. 2022; 68:237–55. <https://doi.org/10.1016/j.socnet.2022.01.003>
17. Robins G. *Doing social network research: Network-based research design for social scientists*. London: SAGE; 2015.
18. McGloin JM, Kirk DS. Social Network Analysis. In: Piquero AR, Weisburd D, editors. *Handbook of Quantitative Criminology*. New York: Springer; 2010. p. 209–24.
19. Freeman LC. Centrality in social networks conceptual clarification. *Social networks*. 1978; 1(3):215–39.
20. Wasserman S, Faust K. *Social network analysis: Methods and applications*. Cambridge, UK: Cambridge University Press; 1994.
21. Robins G, Pattison P, Kalish Y, Lusher D. An introduction to exponential random graph (p\*) models for social networks. *Social Networks*. 2007; 29(2):173–91. <https://doi.org/10.1016/j.socnet.2006.08.002>
22. Crossley N. The social world of the network. Combining qualitative and quantitative elements in social network analysis. *Sociologica*. 2010; 1/2010. <https://doi.org/10.2383/32049>
23. Crossley N, Edwards G. Cases, mechanisms and the real: The theory and methodology of mixed-method social network analysis. *Sociological Research Online*. 2016; 21(2):217–85. <https://doi.org/10.5153/sro.3920>
24. Friedman SR, Neaigus A, Jose B, Curtis R, Goldstein M, Ildefonso G, et al. Sociometric risk networks and risk for HIV infection. *American Journal of Public Health*. 1997; 87(8):1289–96. <https://doi.org/10.2105/ajph.87.8.1289> PMID: 9279263
25. Gyarmathy VA, Caplinskiene I, Caplinskas S, Latkin CA. Social network structure and HIV infection among injecting drug users in Lithuania: gatekeepers as bridges of infection. *AIDS and Behavior*. 2014; 18(3):505–10. <https://doi.org/10.1007/s10461-014-0702-6> PMID: 24469223
26. Bouchard M, Hashimi S, Tsai K, Lampkin H, Jozaghi E. Back to the core: A network approach to bolster harm reduction among persons who inject drugs. *Int J Drug Policy*. 2018; 51:95–104. <https://doi.org/10.1016/j.drugpo.2017.10.006> PMID: 29227844
27. Duxbury SW, Haynie DL. The network structure of opioid distribution on a darknet cryptomarket. *Journal of Quantitative Criminology*. 2018; 34(4):921–41.
28. Degenhardt L, Hall W. Extent of illicit drug use and dependence, and their contribution to the global burden of disease. *The Lancet*. 2012; 379(9810):55–70. [https://doi.org/10.1016/S0140-6736\(11\)61138-0](https://doi.org/10.1016/S0140-6736(11)61138-0) PMID: 22225671
29. Pal R, Megharaj M, Kirkbride KP, Naidu R. Illicit drugs and the environment—a review. *Science of the Total Environment*. 2013; 463:1079–92. <https://doi.org/10.1016/j.scitotenv.2012.05.086> PMID: 22726813
30. Kelly AB, Evans-Whipp TJ, Smith R, Chan GC, Toumbourou JW, Patton GC, et al. A longitudinal study of the association of adolescent polydrug use, alcohol use and high school non-completion. *Addiction*. 2015; 110(4):627–35. <https://doi.org/10.1111/add.12829> PMID: 25510264
31. Kerr T, Small W, Wood E. The public health and social impacts of drug market enforcement: A review of the evidence. *International Journal of Drug Policy*. 2005; 16(4):210–20.
32. Gallagher JR, Nordberg A, Deranek MS, Ivory E, Carlton J, Miller JW. Predicting termination from drug court and comparing recidivism patterns: Treating substance use disorders in criminal justice settings. *Alcoholism Treatment Quarterly*. 2015; 33(1):28–43.
33. De P, Cox J, Boivin JF, Platt RW, Jolly AM. The importance of social networks in their association to drug equipment sharing among injection drug users: a review. *Addiction*. 2007; 102(11):1730–9. <https://doi.org/10.1111/j.1360-0443.2007.01936.x> PMID: 17935581
34. Ghosh D, Krishnan A, Gibson B, Brown S-E, Latkin CA, Altice FL. Social network strategies to address HIV prevention and treatment continuum of care among at-risk and HIV-infected substance users: a

- systematic scoping review. *AIDS and Behavior*. 2017; 21(4):1183–207. <https://doi.org/10.1007/s10461-016-1413-y> PMID: 27125244
35. Bichler G, Malm A, Cooper T. Drug supply networks: a systematic review of the organizational structure of illicit drug trade. *Crime Science*. 2017; 6(1):1–23.
  36. Henneberger AK, Mushonga DR, Preston AM. Peer influence and adolescent substance use: A systematic review of dynamic social network research. *Adolescent Research Review*. 2021; 6(1):57–73. <https://doi.org/10.1007/s40894-019-00130-0>
  37. Jacobs W, Goodson P, Barry AE, McLeroy KR. The role of gender in adolescents' social networks and alcohol, tobacco, and drug use: a systematic review. *Journal of School Health*. 2016; 86(5):322–33. <https://doi.org/10.1111/josh.12381> PMID: 27040470
  38. Montgomery SC, Donnelly M, Bhatnagar P, Carlin A, Kee F, Hunter RF. Peer social network processes and adolescent health behaviors: A systematic review. *Preventive Medicine*. 2020; 130:105900. <https://doi.org/10.1016/j.ypmed.2019.105900> PMID: 31733224
  39. Qiao S, Li X, Stanton B. Social support and HIV-related risk behaviors: a systematic review of the global literature. *AIDS and Behavior*. 2014; 18(2):419–41. <https://doi.org/10.1007/s10461-013-0561-6> PMID: 23921582
  40. Bouchard M, Malm A. Social network analysis and its contribution to research on crime and criminal justice. *Oxford Handbooks Online*: Oxford University Press; 2016.
  41. Hanneman RA, Riddle M. Social network data. 2005. In: *Introduction to social network methods* [Internet]. Riverside, CA: University of California Riverside. <http://faculty.ucr.edu/~hanneman/>.
  42. Arksey H, O'Malley L. Scoping studies: Towards a methodological framework. *International Journal of Social Research Methodology*. 2005; 8(1):19–32.
  43. Levac D, Colquhoun H, O'Brien KK. Scoping studies: Advancing the methodology. *Implementation Science*. 2010; 5(1):1–9. <https://doi.org/10.1186/1748-5908-5-69> PMID: 20854677
  44. Tricco AC, Lillie E, Zarin W, O'Brien KK, Colquhoun H, Levac D, et al. PRISMA extension for scoping reviews (PRISMA-ScR): checklist and explanation. *Annals of Internal Medicine*. 2018; 169(7):467–73. <https://doi.org/10.7326/M18-0850> PMID: 30178033
  45. Munn Z, Peters MD, Stern C, Tufanaru C, McArthur A, Aromataris E. Systematic review or scoping review? Guidance for authors when choosing between a systematic or scoping review approach. *BMC Medical Research Methodology*. 2018; 18(1):1–7.
  46. Smith RV, Young AM, Mullins UL, Havens JR. Individual and network correlates of antisocial personality disorder among rural nonmedical prescription opioid users. *J Rural Health*. 2017; 33(2):198–207. <https://doi.org/10.1111/jrh.12184> PMID: 27171488
  47. Latkin CA, Knowlton AR, Sherman S. Routes of drug administration, differential affiliation, and lifestyle stability among cocaine and opiate users: implications to HIV prevention. *Journal of Substance Abuse*. 2001; 13(1–2):89–102. [https://doi.org/10.1016/s0899-3289\(01\)00070-0](https://doi.org/10.1016/s0899-3289(01)00070-0) PMID: 11547627
  48. QSR International Pty Ltd. NVivo (Version 12) 2018. <https://www.qsrinternational.com/nvivo-qualitative-data-analysis-software/home>.
  49. Salganik MJ, Heckathorn DD. Sampling and estimation in hidden populations using respondent-driven sampling. *Sociological Methodology*. 2004; 34(1):193–240.
  50. Calderoni F, Skillicorn DB, Zheng Q. Inductive discovery of criminal group structure using spectral embedding. *Information & Security: An International Journal*. 2014; 31:49–66.
  51. Skillicorn DB, Zheng Q, Morselli C. Spectral embedding for dynamic social networks. *Proceedings of the 2013 IEEE/ACM International Conference on Advances in Social Networks Analysis and Mining*. 2013:316–23.
  52. Shomade SA. Case study of the structures of criminal and drug courts: The University of Arizona; 2007.
  53. Spear SE. Coordination of care in substance abuse treatment: An interorganizational perspective: UCLA; 2012.
  54. Hofmann DC, Gallupe O. Leadership protection in drug-trafficking networks. *Global Crime*. 2015; 16(2):123–38. <https://doi.org/10.1080/17440572.2015.1008627>
  55. Jones NP, Dittmann WL, Wu J, Reese T. A mixed methods social network analysis of a cross-border drug network: the Fernando Sanchez organization (FSO). *Trends in Organized Crime*. 2018; 23(2):154–82. <https://doi.org/10.1007/s12117-018-9352-9>
  56. Silva LD, Strobbe S, Oliveira JL, Almeida LY, Cardano M, Souza J. Social support networks of users of crack cocaine and the role of a Brazilian health program for people living on the street: A qualitative study. *Arch Psychiatr Nurs*. 2021; 35(5):526–33. <https://doi.org/10.1016/j.apnu.2021.06.010> PMID: 34561069

57. Baika L, Campana P. Centrality, mobility, and specialization: a study of drug markets in a non-metropolitan area in the United Kingdom. *Journal of Drug Issues*. 2020; 50(2):107–26.
58. Basu K, Sen A. Identifying individuals associated with organized criminal networks: a social network analysis. *Social Networks*. 2021; 64:42–54.
59. Benítez GJ. Mapping Colombia's Counternarcotics Networks: The Rise of Latin American and Caribbean Partnerships. *The Latin Americanist*. 2019; 63(3):275–306.
60. Bright DA, Greenhill C, Ritter A, Morselli C. Networks within networks: using multiple link types to examine network structure and identify key actors in a drug trafficking operation. *Global Crime*. 2015; 16(3):219–37. <https://doi.org/10.1080/17440572.2015.1039164>
61. Bright DA, Greenhill C, Reynolds M, Ritter A, Morselli C. The Use of Actor-Level Attributes and Centrality Measures to Identify Key Actors: A Case Study of an Australian Drug Trafficking Network. *Journal of Contemporary Criminal Justice*. 2015; 31(3):262–78. <https://doi.org/10.1177/1043986214553378>
62. Bright D, Hughes C, Chalmers J. Illuminating dark networks: a social network analysis of an Australian drug trafficking syndicate. *Crime, Law & Social Change*. 2012; 57(2):151–76. <https://doi.org/10.1007/s10611-011-9336-z>
63. Bright DA, Delaney JJ. Evolution of a drug trafficking network: Mapping changes in network structure and function across time. *Global Crime*. 2013; 14(2–3):238–60. <https://doi.org/10.1080/17440572.2013.787927>
64. Calderoni F. The structure of drug trafficking mafias: the 'Ndrangheta and cocaine. *Crime, Law and Social Change*. 2012; 58(3):321–49. <https://doi.org/10.1007/s10611-012-9387-9>
65. Calderoni F. Strategic positioning in mafia networks. *Crime and Networks*: Routledge; 2013. p. 163–81.
66. Canter D. A partial order scalogram analysis of criminal network structures. *Behaviormetrika*. 2004; 31(2):131–52.
67. Gimenez-Salinas Framis A. Illegal networks or criminal organizations: Power, roles and facilitators in four cocaine trafficking structures. In: Morselli C, editor. *Crime and Networks*. New York: Routledge; 2013. p. 131–48.
68. Garay-Salamanca LJ, Salcedo-Albarán E. Institutional impact of criminal networks in Colombia and Mexico. *Crime, Law and Social Change*. 2011; 57(2):177–94. <https://doi.org/10.1007/s10611-011-9338-x>
69. Heber A. The networks of drug offenders. *Trends in Organized Crime*. 2009; 12(1):1–20. <https://doi.org/10.1007/s12117-008-9055-8>
70. Hu D, Kaza S, Chen H. Identifying significant facilitators of dark network evolution. *Journal of the American Society for Information Science and Technology*. 2009; 60(4):655–65. <https://doi.org/10.1002/asi.21008>
71. Hughes CE, Bright DA, Chalmers J. Social network analysis of Australian poly-drug trafficking networks: How do drug traffickers manage multiple illicit drugs? *Social Networks*. 2017; 51:135–47. <https://doi.org/10.1016/j.socnet.2016.11.004>
72. Mainas ED. The analysis of criminal and terrorist organisations as social network structures: a quasi-experimental study. *International Journal of Police Science & Management*. 2012; 14(3):264–82.
73. Malm A, Bichler G. Networks of Collaborating Criminals: Assessing the Structural Vulnerability of Drug Markets. *Journal of Research in Crime and Delinquency*. 2011; 48(2):271–97. <https://doi.org/10.1177/0022427810391535>
74. Malm A, Bichler G. Using friends for money: the positional importance of money-launderers in organized crime. *Trends in Organized Crime*. 2013; 16(4):365–81. <https://doi.org/10.1007/s12117-013-9205-5>
75. Malm AE, Kinney JB, Pollard NR. Social Network and Distance Correlates of Criminal Associates Involved in Illicit Drug Production. *Security Journal*. 2008; 21(1–2):77–94. <https://doi.org/10.1057/palgrave.sj.8350069>
76. Malm A, Bichler G, Van De Walle S. Comparing the ties that bind criminal networks: Is blood thicker than water? *Security Journal*. 2010; 23(1):52–74.
77. Masias VH, Valle M, Morselli C, Crespo F, Vargas A, Laengle S. Modeling Verdict Outcomes Using Social Network Measures: The Watergate and Caviar Network Cases. *PLoS One*. 2016; 11(1): e0147248. Epub 20160129. <https://doi.org/10.1371/journal.pone.0147248> PMID: 26824351.
78. Morselli C. Hells Angels in springtime. *Trends in organized crime*. 2009; 12(2):145–58.
79. Morselli C. Assessing vulnerable and strategic positions in a criminal network. *Journal of Contemporary Criminal Justice*. 2010; 26(4):382–92.

80. Morselli C, Giguere C. Legitimate strengths in criminal networks. *Crime, Law and Social Change*. 2006; 45(3):185–200.
81. Morselli C, Petit K. Law-Enforcement Disruption of a Drug Importation Network. *Global Crime*. 2007; 8(2):109–30. <https://doi.org/10.1080/17440570701362208>
82. Morselli C, Giguère C, Petit K. The efficiency/security trade-off in criminal networks. *Social networks*. 2007; 29(1):143–53.
83. Natarajan M. Understanding the structure of a drug trafficking organization: a conversational analysis. *Crime Prevention Studies*. 2000; 11:273–98.
84. Natarajan M. Understanding the Structure of a Large Heroin Distribution Network: A Quantitative Analysis of Qualitative Data. *Journal of Quantitative Criminology*. 2006; 22(2):171–92. <https://doi.org/10.1007/s10940-006-9007-x>
85. Norbutas L. Offline constraints in online drug marketplaces: An exploratory analysis of a cryptomarket trade network. *Int J Drug Policy*. 2018; 56:92–100. <https://doi.org/10.1016/j.drugpo.2018.03.016> PMID: 29621742
86. O'Reilly MJA, Hughes CE, Bright DA, Ritter A. Structural and functional changes in an Australian high-level drug trafficking network after exposure to supply changes. *Int J Drug Policy*. 2020; 84:102797. Epub 20200804. <https://doi.org/10.1016/j.drugpo.2020.102797> PMID: 32763755.
87. Roberts RJ. Re-Spatializing Gangs in the United States: An Analysis of Macro-and Micro-Level Network Structures. 2021.
88. Tenti V, Morselli C. Group co-offending networks in Italy's illegal drug trade. *Crime, Law and Social Change*. 2014; 62(1):21–44. <https://doi.org/10.1007/s10611-014-9518-6>
89. Turhal T. Organizational structure of PKK and non-PKK-linked Turkish drug trafficking organizations: The influence of social bonds: George Mason University; 2015.
90. Ünal MC. Do terrorists make a difference in criminal networks? An empirical analysis on illicit drug and narco-terror networks in their prioritization between security and efficiency. *Social Networks*. 2019; 57:1–17. <https://doi.org/10.1016/j.socnet.2018.11.001>
91. Wendel T, Khan B, Dombrowski K, Curtis R, McLean K, Misshula E, et al. Dynamics of methamphetamine markets in New York City: Final technical report to the National Institute of Justice. U.S. Department of Justice, 2011.
92. Wood G. The structure and vulnerability of a drug trafficking collaboration network. *Social Networks*. 2017; 48:1–9. <https://doi.org/10.1016/j.socnet.2016.07.001>
93. Xu J, Chen H. The topology of dark networks. *Communications of the ACM*. 2008; 51(10):58–65.
94. Xu J, Marshall B, Kaza S, Chen H. Analyzing and visualizing criminal network dynamics: A case study. *International Conference on Intelligence and Security Informatics*. 2004:359–77.
95. Morselli C, Paquet-Clouston M, Provost C. The independent's edge in an illegal drug distribution setting: Levitt and Venkatesh revisited. *Social Networks*. 2017; 51:118–26.
96. Xu J, Chen H. Untangling Criminal Networks: A Case Study. In: Chen H, Miranda R, Zeng DD, Demchak C, Schroeder J, Madhusudan T, editors. *Intelligence and Security Informatics*. Berlin, Heidelberg: Springer Berlin Heidelberg; 2003. p. 232–48.
97. Salazar B, Restrepo LM. Lethal closeness: The evolution of a small-world drug trafficking network. *Desafios*. 2011; 23(2):197–221.
98. Bright D, Koskinen J, Malm A. Illicit network dynamics: The formation and evolution of a drug trafficking network. *Journal of Quantitative Criminology*. 2019; 35(2):237–58.
99. Arimoto MV. Peer Influence and Adolescent Substance Use: A Social Networks Analysis: Washington State University; 2010.
100. Bell DC, Atkinson JS, Carlson JW. Centrality measures for disease transmission networks. *Social Networks*. 1999; 21(1):1–21.
101. Dombrowski K, Curtis R, Friedman S, Khan B. Topological and Historical Considerations for Infectious Disease Transmission among Injecting Drug Users in Bushwick, Brooklyn (USA). *World J AIDS*. 2013; 3(1):1–9. <https://doi.org/10.4236/wja.2013.31001> PMID: 24672745
102. Dombrowski K, Khan B, McLean K, Curtis R, Wendel T, Misshula E, et al. A reexamination of connectivity trends via exponential random graph modeling in two IDU risk networks. *Substance Use & Misuse*. 2013; 48(14):1485–97. <https://doi.org/10.3109/10826084.2013.796987> PMID: 23819740
103. Heckathorn DD, Broadhead RS, Anthony DL, Weakliem DL. AIDS and social networks: HIV prevention through network mobilization. *Sociological Focus*. 1999; 32(2):159–79.
104. Jonas AB, Young AM, Oser CB, Leukefeld CG, Havens JR. OxyContin(R) as currency: OxyContin(R) use and increased social capital among rural Appalachian drug users. *Soc Sci Med*. 2012; 74(10):1602–9. <https://doi.org/10.1016/j.socscimed.2011.12.053> PMID: 22465379

105. Li J, Weeks MR, Borgatti SP, Clair S, Dickson-Gomez J. A social network approach to demonstrate the diffusion and change process of intervention from peer health advocates to the drug using community. *Subst Use Misuse*. 2012; 47(5):474–90. <https://doi.org/10.3109/10826084.2012.644097> PMID: [22428816](https://pubmed.ncbi.nlm.nih.gov/22428816/)
106. Murfree ST. An examination of the social and community context of substance use disorder recovery support services in Rutherford County, Tennessee: Middle Tennessee State University; 2021.
107. Rudolph AE, Young AM, Havens JR. Examining the social context of injection drug use: social proximity to persons who inject drugs versus geographic proximity to persons who inject drugs. *American Journal of Epidemiology*. 2017; 186(8):970–8. <https://doi.org/10.1093/aje/kwx162> PMID: [28535162](https://pubmed.ncbi.nlm.nih.gov/28535162/)
108. Schaefer DR, Davidson KM, Haynie DL, Bouchard M. Network integration within a prison-based therapeutic community. *Social Networks*. 2021; 64:16–28. <https://doi.org/10.1016/j.socnet.2020.07.007> PMID: [32921897](https://pubmed.ncbi.nlm.nih.gov/32921897/)
109. Shamesmaeli A, Haghdoost AA, Soori H. Network location and risk of human immunodeficiency virus transmission among injecting drug users: Results of multiple membership multilevel modeling of social networks. *Addiction & Health*. 2015; 7(1–2):1–13. PMID: [26322205](https://pubmed.ncbi.nlm.nih.gov/26322205/)
110. Singleton AL, Marshall BDL, Bessey S, Harrison MT, Galvani AP, Yedinak JL, et al. Network structure and rapid HIV transmission among people who inject drugs: A simulation-based analysis. *Epidemics*. 2021; 34. <https://doi.org/10.1016/j.epidem.2020.100426> PMID: [33341667](https://pubmed.ncbi.nlm.nih.gov/33341667/)
111. Weeks MR, Clair S, Borgatti SP, Radda K, Schensul JJ. Social networks of drug users in high-risk sites: Finding the connections. *AIDS and Behavior*. 2002; 6(2):193–206.
112. Young A, Jonas A, Mullins U, Halgin DS, Havens J. Network structure and the risk for HIV transmission among rural drug users. *AIDS and Behavior*. 2013; 17(7):2341–51. <https://doi.org/10.1007/s10461-012-0371-2> PMID: [23184464](https://pubmed.ncbi.nlm.nih.gov/23184464/)
113. Young AM, DiClemente RJ, Halgin DS, Sterk CE, Havens JR. Drug users' willingness to encourage social, sexual, and drug network members to receive an HIV vaccine: a social network analysis. *AIDS Behav*. 2014; 18(9):1753–63. <https://doi.org/10.1007/s10461-014-0797-9> PMID: [24849621](https://pubmed.ncbi.nlm.nih.gov/24849621/)
114. Young AM, Halgin DS, DiClemente RJ, Sterk CE, Havens JR. Will HIV vaccination reshape HIV risk behavior networks? A social network analysis of drug users' anticipated risk compensation. *PLoS One*. 2014; 9(7):e101047. <https://doi.org/10.1371/journal.pone.0101047> PMID: [24992659](https://pubmed.ncbi.nlm.nih.gov/24992659/)
115. Yoon S, Odium M, Broadwell P, Davis N, Cho H, Deng N, et al. Application of social network analysis of COVID-19 related tweets mentioning cannabis and opioids to gain insights for drug abuse research. *Stud Health Technol Inform*. 2020; 272:5–8. <https://doi.org/10.3233/SHTI200479> PMID: [32604586](https://pubmed.ncbi.nlm.nih.gov/32604586/)
116. Koturovic D. Organised networks in Serbia: Crime control and state capture in a country undergoing democratic transition and EU accession: University of Sheffield; 2019.
117. Musto C. Regulating Cannabis Markets. The construction of an innovative drug policy in Uruguay: University of Kent, Utrecht University; 2018.
118. Bouchard M, Ouellet F. Is small beautiful? The link between risks and size in illegal drug markets. *Global Crime*. 2011; 12(1):70–86.
119. Rudolph AE, Young AM, Havens JR. Using network and spatial data to better target overdose prevention strategies in rural Appalachia. *J Urban Health*. 2019; 96(1):27–37. <https://doi.org/10.1007/s11524-018-00328-y> PMID: [30465260](https://pubmed.ncbi.nlm.nih.gov/30465260/)
120. Kwan TH, Wong NS, Lee SS. Participation dynamics of a cohort of drug users in a low-threshold methadone treatment programme. *Harm Reduct J*. 2015; 12:30. <https://doi.org/10.1186/s12954-015-0072-z> PMID: [26470863](https://pubmed.ncbi.nlm.nih.gov/26470863/)
121. Morselli C. Structuring Mr. Nice: Entrepreneurial opportunities and brokerage positioning in the cannabis trade. *Crime, Law and Social Change*. 2001; 35(3):203–44.
122. Hollstein B. Mixed methods social networks research: An introduction. In: Dominguez S, Hollstein B, editors. *Mixed methods social networks research: Design and applications*. New York: Cambridge University Press; 2014. p. 3–35.
123. Shearer JC, Lavis J, Abelson J, Walt G, Dion M. Evidence-informed policymaking and policy innovation in a low-income country: does policy network structure matter? *Evidence & Policy: A Journal of Research, Debate and Practice*. 2018; 14(3):381–401.
124. Oliver K, de Vocht F, Money A, Everett M. Who runs public health? A mixed-methods study combining qualitative and network analyses. *Journal of Public Health*. 2013; 35(3):453–9. <https://doi.org/10.1093/pubmed/ftd039> PMID: [23564840](https://pubmed.ncbi.nlm.nih.gov/23564840/)
125. Cvitanovic C, Cunningham R, Dowd AM, Howden SM, van Putten E. Using social network analysis to monitor and assess the effectiveness of knowledge brokers at connecting scientists and decision-makers: An Australian case study. *Environmental Policy and Governance*. 2017; 27(3):256–69.

126. Dörry S, Walther O. Relational policy spaces in border regions. Luxembourg Institute of Socio-Economic Research (LISER) Working Paper Series 2013–23. 2013.
127. Queirolo R. Uruguay: The first country to legalize cannabis. In: Decorte T, Lenton S, Wilkins C, editors. *Legalizing Cannabis*. Routledge; 2020. p. 116–30.
128. Department of Justice Canada. Cannabis Legalization and Regulation: Government of Canada; 2021 [cited 2022 March 4]. <https://www.justice.gc.ca/eng/cj-jp/cannabis/>.
129. Ghossoub M. B.C. applies to decriminalize use of small amounts of illicit drugs in effort to reduce deaths. CBC. 2021 November 1.
130. Grant MJ, Booth A. A typology of reviews: an analysis of 14 review types and associated methodologies. *Health Information & Libraries Journal*. 2009; 26(2):91–108. <https://doi.org/10.1111/j.1471-1842.2009.00848.x> PMID: 19490148
131. Butler A, Zakimi N, Greer A. Total systems failure: police officers' perspectives on the impacts of the justice, health, and social service systems on people who use drugs. *Harm Reduction Journal*. 2022; 19(1):48. <https://doi.org/10.1186/s12954-022-00629-1> PMID: 35590421
132. World Health Organization. Social determinants of health: the solid facts: World Health Organization. Regional Office for Europe; 2003.
133. Kerman N, Manoni-Millar S, Cormier L, Cahill T, Sylvestre J. "It's not just injecting drugs": Supervised consumption sites and the social determinants of health. *Drug and Alcohol Dependence*. 2020; 213:108078. <https://doi.org/10.1016/j.drugalcdep.2020.108078> PMID: 32485658
134. Bluthenthal RN. Structural racism and violence as social determinants of health: Conceptual, methodological and intervention challenges. *Drug and Alcohol Dependence*. 2021; 222:108681. <https://doi.org/10.1016/j.drugalcdep.2021.108681> PMID: 33757711
